# Supplementary material for: A shape memory supercapacitor and its application in smart energy storage textiles
Source: Royal Society of Chemistry journal article supplement (doi:10.1039/c5ta09473a), 2015-12-08
Supplement: c5ta09473a5.pdf [file c5ta09473a5.pdf]

## A shape memory supercapacitor and its application in smart energy storage textile

Yang Huang,<sup>a</sup> Minshen Zhu,<sup>a</sup> Zhengxia Pei,<sup>a</sup> Qi Xue,<sup>a</sup> Yan Huang,<sup>a</sup> and Chunyi Zhi<sup>a,b,\*</sup>

<sup>a</sup>Department of Physics and Materials Science, City University of Hong Kong, 83 Tat Chee Avenue, Kowloon, Hong Kong.

<sup>b</sup>Shenzhen Research Institute, City University of Hong Kong, Shenzhen, P. R. China

E-mail: [cy.zhi@cityu.edu.hk](mailto:cy.zhi@cityu.edu.hk); Fax: 852-3442-0538; Tel:852-3442-7891

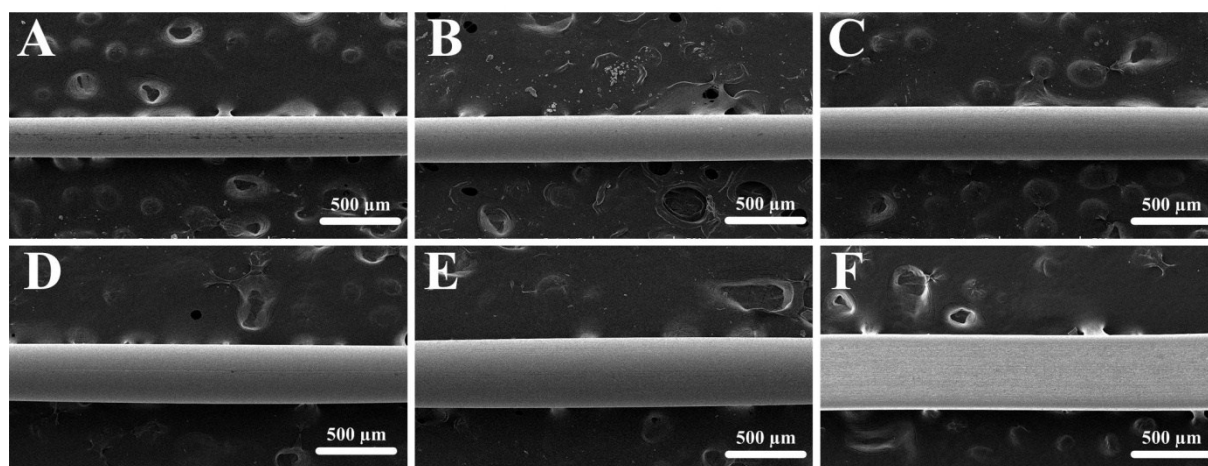

Fig. S1 SEM images of NiTi SMA wires with different diameters.

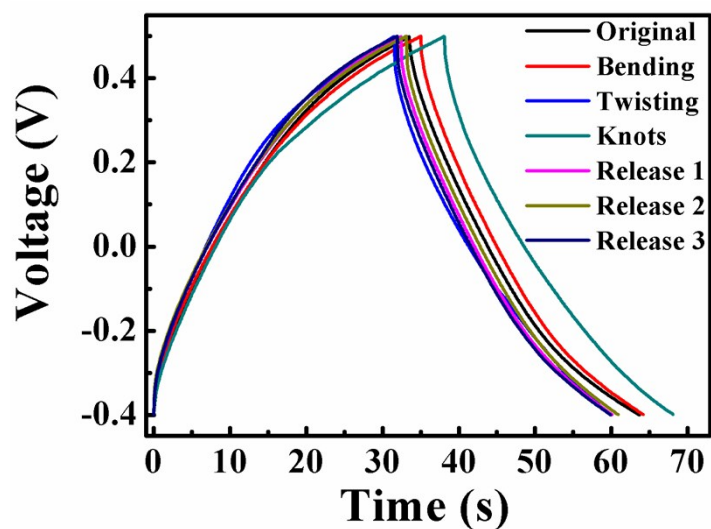

Fig. S2 GCD curves obtained at a current density of 1 mA under different deformations.

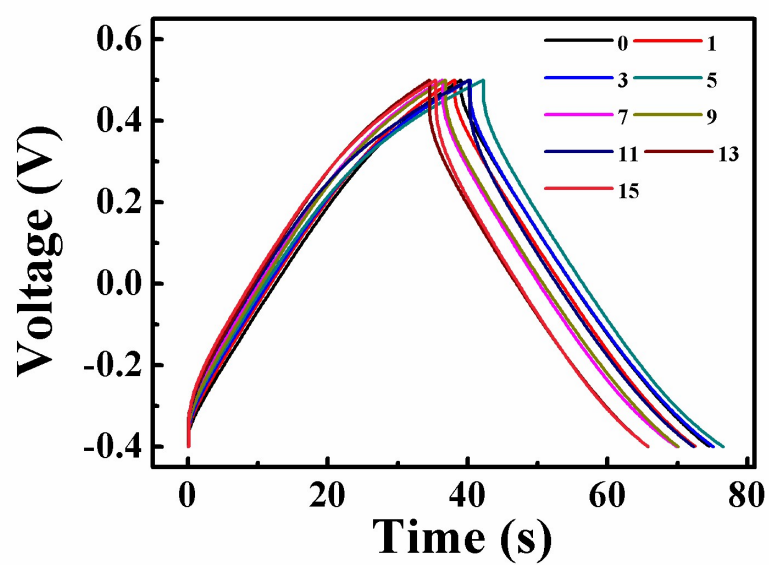

Fig. S3 GCD curves obtained at a current density of 1 mA after shape recovery for different cycles.

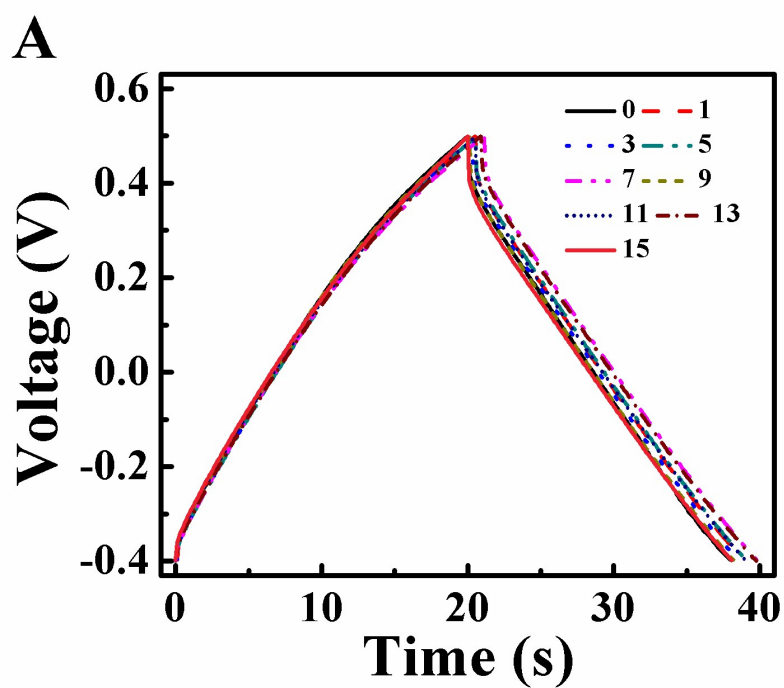

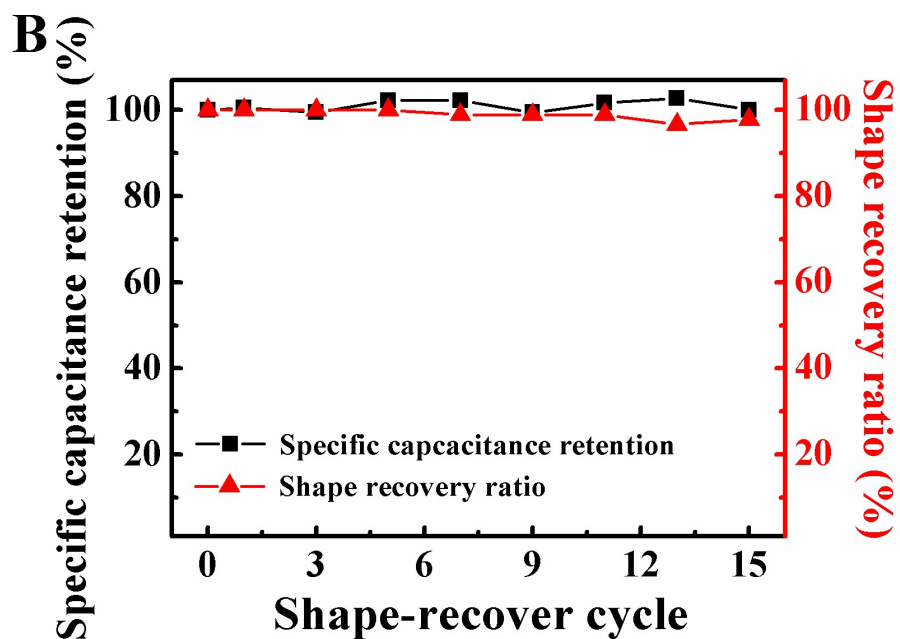

Fig. S4 (a) GCD curves obtained at a current density of 1 mA after shape recovery for different cycles at different region. (b) Capacitance retention and shape recovery ratio of the SMSC before and after shape recovery for different cycles at different region.

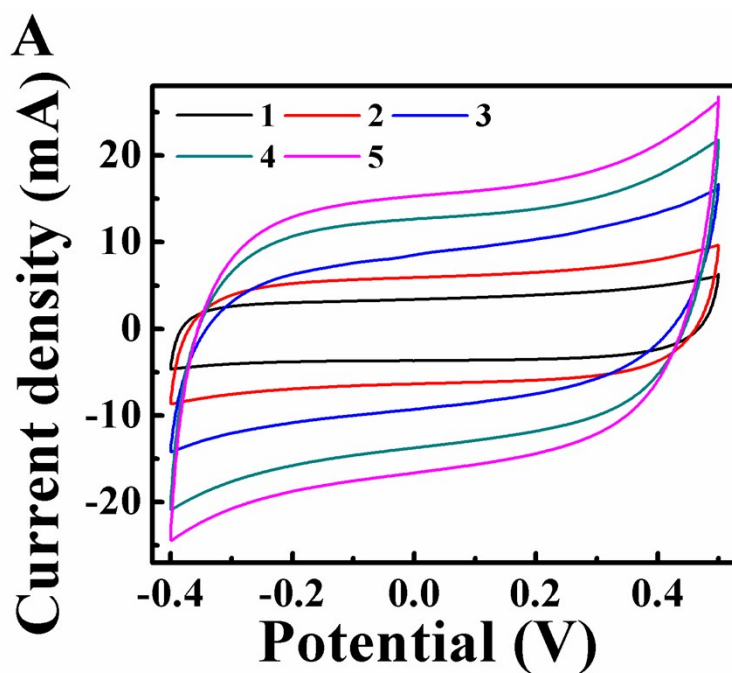

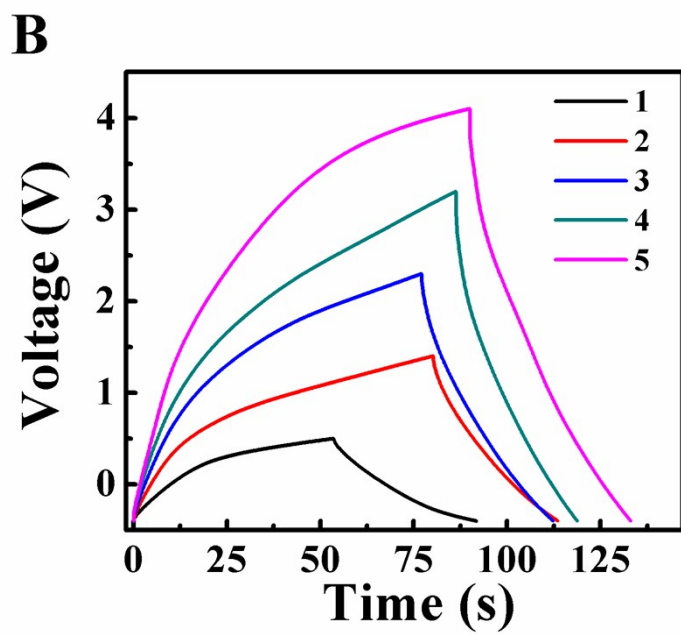

**Fig. S5** (a) CVs obtained at a scan rate of  $100 \text{ mV s}^{-1}$  of the devices in parallel. (b) GCD curves obtained at a current density of  $1 \text{ mA}$  of the devices in series.
